# Supplementary material for: Cellular Heterogeneity–Adjusted cLonal Methylation (CHALM) improves prediction of gene expression
Source: PubMed Central journal article supplement (PMC7811027; doi:10.1038/s41467-020-20492-7), 2021-01-15
Supplement: 41467_2020_20492_MOESM3_ESM.pdf [file 41467_2020_20492_MOESM3_ESM.pdf]

## **Description of Additional Supplementary Files**

Supplementary Data 1: List of promoter CGIs defined in hg19 genome reference

Supplementary Data 2: List of differentially methylated promoter CGIs between lung tumor-normal pair

Supplementary Data 3: List of de novo differentially methylated regions between LUAD and SCLC

Supplementary Data 4: List of datasets used in this study
